# Supplementary material for: An EPR study on the radiolysis of isolated ethanol molecules in solid argon and xenon: matrix control of radiation-induced generation of radicals in cryogenic media
Source: Royal Society of Chemistry journal article supplement (doi:10.1039/d2cp05356j), 2023-01-01
Supplement: d2cp05356j1.pdf [file d2cp05356j1.pdf]

## Electronic Supplementary Information for

### **An EPR study on the radiolysis of isolated ethanol molecules in solid argon and xenon: matrix control of radiation-induced generation of radicals in cryogenic media**

Pavel V. Zasimov, Elizaveta V. Sanochkina, Daniil A. Tyurin, and Vladimir I. Feldman\*

*Department of Chemistry, Lomonosov Moscow State University, 119991 Moscow, Russia*

\*Corresponding author, e-mail: [feldman@rad.chem.msu.ru](mailto:feldman@rad.chem.msu.ru) (V.F.)

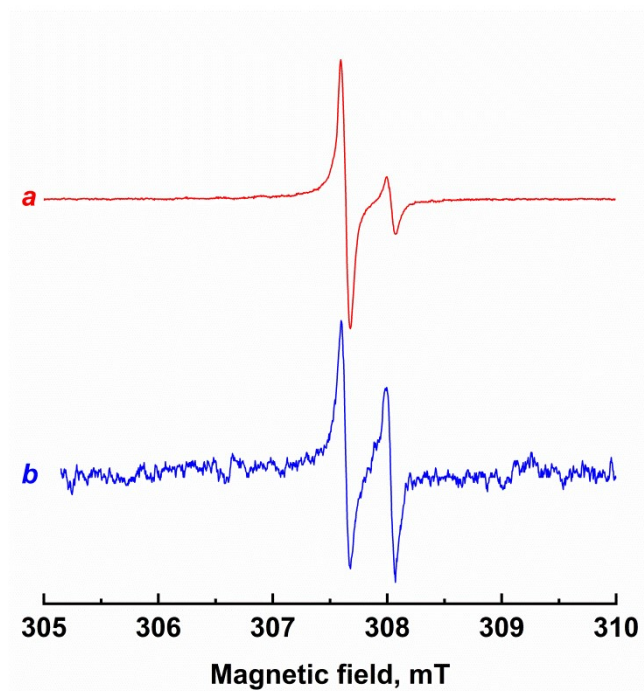

**Fig. S1** Normalized EPR spectra (at 9.3790 GHz microwave frequency and 10.7  $\mu$ W microwave power) of the  $\text{CH}_3\text{CH}_2\text{OH}/\text{Ar}$  1:1000 (*a*) and  $\text{CH}_3\text{CH}_2\text{OH}/\text{CFC1}_3/\text{Ar}$  1:2:1000 (*b*) samples after 15 min irradiation with X-rays showing the low-field component of the signal of hydrogen atoms. The spectra were recorded at different gains at 7 K.

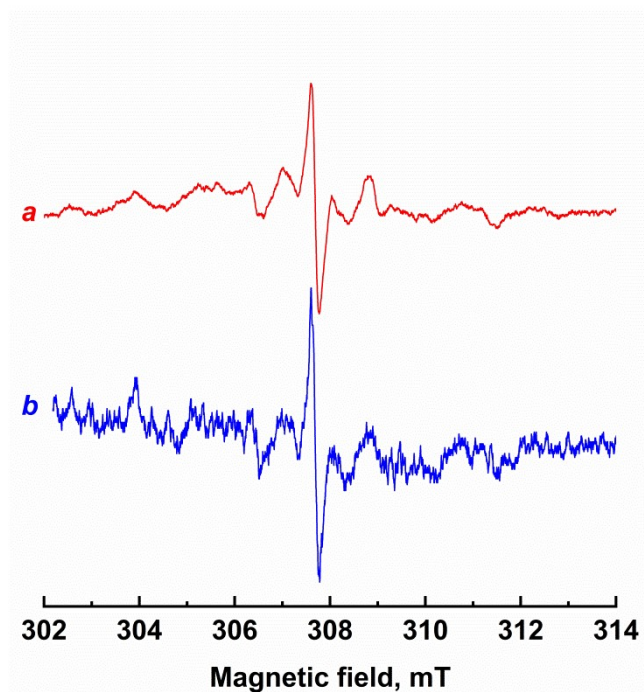

**Fig. S2** Normalized EPR spectra (at 9.3820 GHz microwave frequency and 10.7  $\mu$ W microwave power) of the  $\text{CH}_3\text{CH}_2\text{OH}/\text{Xe}$  (*a*) and  $\text{CH}_3\text{CD}_2\text{OH}/\text{Xe}$  (*b*) 1:1000 samples after 10 min irradiation with X-rays showing the low-field component of the signal of hydrogen atoms. The spectra were recorded at different gains at 7 K.

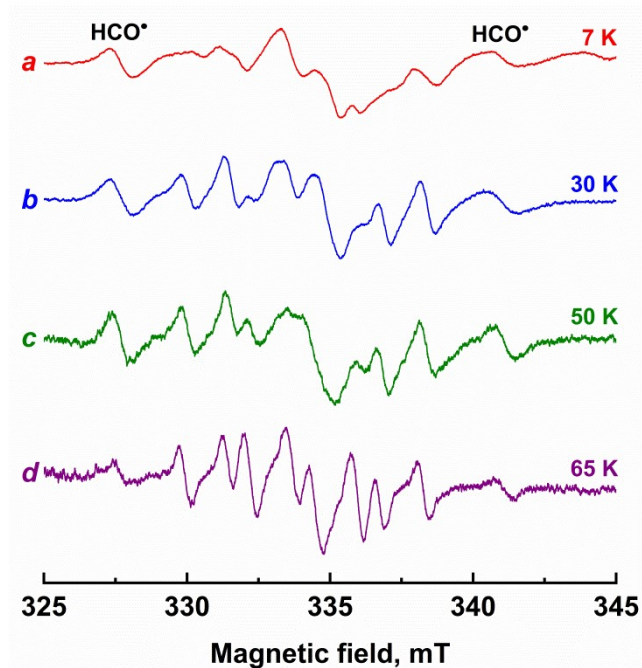

**Fig. S3** Normalized EPR spectra (at 9.3799 GHz microwave frequency and 300  $\mu$ W microwave power) of the  $\text{CH}_3\text{CH}_2\text{OH}/\text{Xe}$  1:1000 samples after 20 min irradiation with X-rays at 7 K (*a*) and recorded during the subsequent annealing at 30, 50, and 65 K (*b*, *c*, and *d*) showing the central region of the spectra.

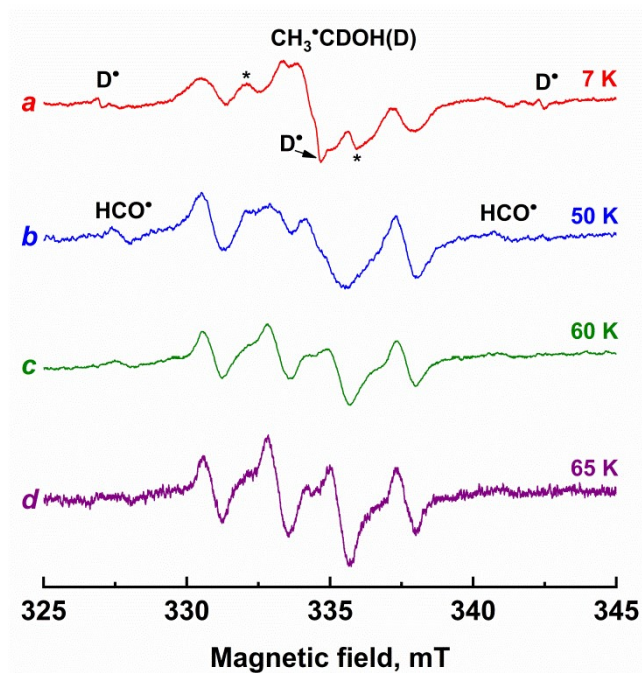

**Fig. S4** Normalized EPR spectra (at 9.3761 GHz microwave frequency and 300  $\mu$ W microwave power) of the  $\text{CH}_3\text{CD}_2\text{OH}/\text{Xe}$  1:1000 samples after 10 min irradiation with X-rays at 7 K (*a*) and recorded during the subsequent annealing at 50, 60, and 65 K (*b*, *c*, and *d*) showing the central region of the spectra.

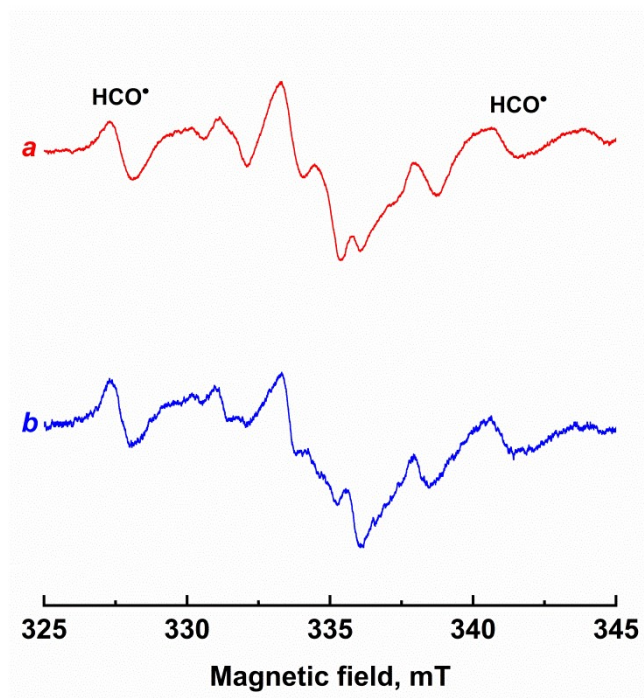

**Fig. S5** Normalized EPR spectra (at 9.3799 GHz microwave frequency and 300  $\mu$ W microwave power) of the  $\text{CH}_3\text{CH}_2\text{OH}/\text{Xe}$  1:1000 (*a*) and  $\text{CH}_3\text{CH}_2\text{OH}/\text{CFCl}_3/\text{Xe}$  1:2:1000 (*b*) samples after (a) 20 and (b) 30 min of irradiation with X-rays showing central region of the spectra. The spectra were recorded at different gains at 7 K.
